# Supplementary material for: Analysis of the WUSCHEL-RELATED HOMEOBOX gene family in the conifer picea abies reveals extensive conservation as well as dynamic patterns
Source: PubMed Central journal article supplement (PMC3701499; doi:10.1186/1471-2229-13-89), 2013-06-12
Supplement: 1471-2229-13-89-S2.pdf [file 1471-2229-13-89-S2.pdf]

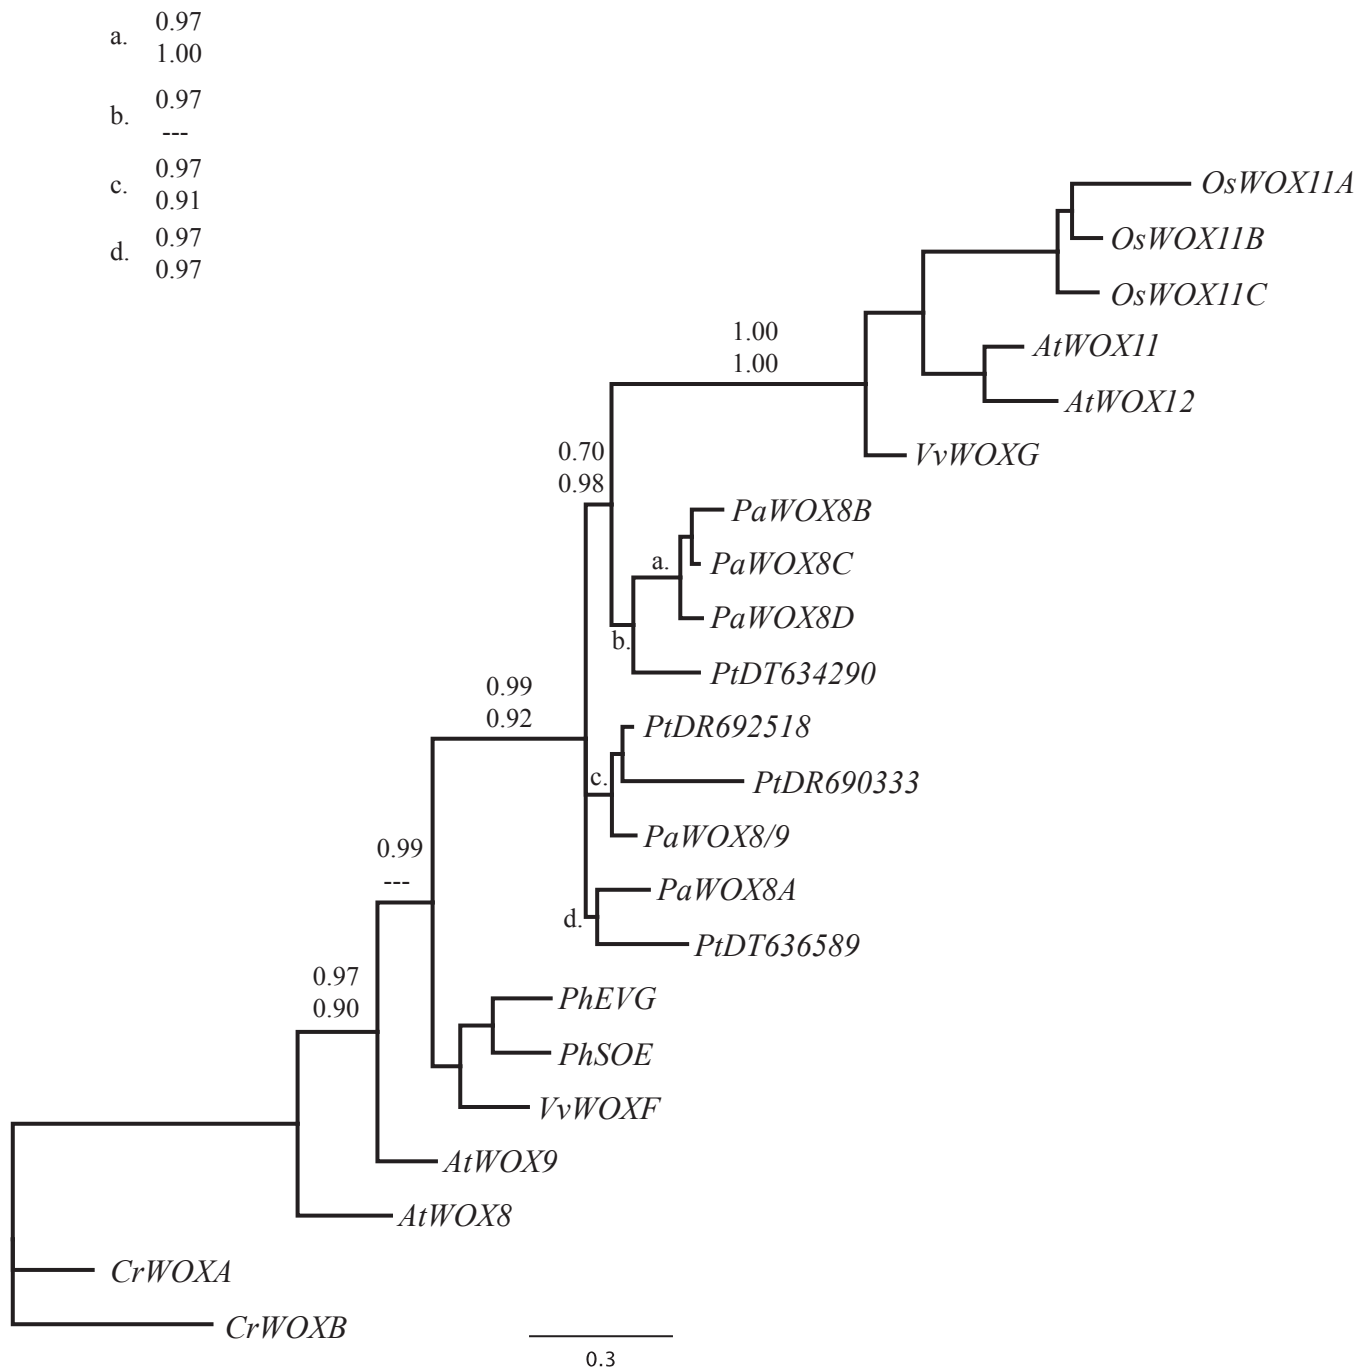

**Additional file 2.** Phylogenetic tree of the intermediate clade *WOX* genes including EST sequences from *Pinus taeda* (*Pt*). Analyses were done using the BI method described in the methods sections. Exceptions were: amino acid model used was mixed, and burn-in was 1250. Support values are posterior probabilities DNA data above protein data.

AtWOX8  
AtWOX9  
PHEV  
PhSOE  
VWOXF  
PaWOX8/9  
PDR692518  
PDR690333  
PaWOX8A  
PDT636589  
PDT634290  
PaWOX8B  
PaWOX8C  
PaWOX8D  
AtWOX11  
AtWOX12  
VWOXG  
OsWOXA  
OsWOXB  
OsWOXD  
CfWOXA  
CfWOXB

AtWOX8  
AtWOX9  
PHEV  
PhSOE  
VWOXF  
PaWOX8/9  
PDR692518  
PDR690333  
PaWOX8A  
PDT636589  
PDT634290  
PaWOX8B  
PaWOX8C  
PaWOX8D  
AtWOX11  
AtWOX12  
VWOXG  
OsWOXA  
OsWOXB  
OsWOXD  
CfWOXA  
CfWOXB

AtWOX8  
AtWOX9  
PHEV  
PhSOE  
VWOXF  
PaWOX8/9  
PDR692518  
PDR690333  
PaWOX8A  
PDT636589  
PDT634290  
PaWOX8B  
PaWOX8C  
PaWOX8D  
AtWOX11  
AtWOX12  
VWOXG  
OsWOXA  
OsWOXB  
OsWOXD  
CfWOXA  
CfWOXB

AtWOX8  
AtWOX9  
PHEV  
PhSOE  
VWOXF  
PaWOX8/9  
PDR692518  
PDR690333  
PaWOX8A  
PDT636589  
PDT634290  
PaWOX8B  
PaWOX8C  
PaWOX8D  
AtWOX11  
AtWOX12  
VWOXG  
OsWOXA  
OsWOXB  
OsWOXD  
CfWOXA  
CfWOXB

AtWOX8  
AtWOX9  
PHEV  
PhSOE  
VWOXF  
PaWOX8/9  
PDR692518  
PDR690333  
PaWOX8A  
PDT636589  
PDT634290  
PaWOX8B  
PaWOX8C  
PaWOX8D  
AtWOX11  
AtWOX12  
VWOXG  
OsWOXA  
OsWOXB  
OsWOXD  
CfWOXA  
CfWOXB

AtWOX8  
AtWOX9  
PHEV  
PhSOE  
VWOXF  
PaWOX8/9  
PDR692518  
PDR690333  
PaWOX8A  
PDT636589  
PDT634290  
PaWOX8B  
PaWOX8C  
PaWOX8D  
AtWOX11  
AtWOX12  
VWOXG  
OsWOXA  
OsWOXB  
OsWOXD  
CfWOXA  
CfWOXB
